# Supplementary material
Source: publisher site journal article supplement (https://www.dovepress.com/article/318502)
Supplement: Supplementary file 1 [file get_supplementary_file.php]

**Title: The Usefulness of FEF25-75 in Predicting Airway Hyperresponsiveness to Mannitol**

**Running title**: FEF25-75 for predicting airway hyperresponsiveness

**Authors**

Youlim Kim1**†**, Hyun Lee2**†**, Sung Jun Chung2**†**, Yoomi Yeo2, Tai Sun Park2, Dong Won Park2, Kyung Hoon Min3, Sang-Heon Kim2, Tae-Hyung Kim2, Jang Won Sohn2, Ji-Yong Moon2***,**andHo Joo Yoon2*

**†**These authors contributed equally to this work.

*These authors contributed equally to this work.

**Online data supplement**

Table S1. The baseline characteristics of study population with normal spirometry

|  | ALL  (n=302) | AHR  (n=40) | Non-AHR  (n=262) | *p* value* |
| --- | --- | --- | --- | --- |
| Age | 50.4 ± 18.5 | 44.4 ± 18.1 | 51.4 ± 18.4 | 0.027 |
| Gender (male) |  |  |  |  |
| Height (meter) | 161.8 ± 9.4 | 162.0 ± 9.8 | 161.7 ± 9.3 | 0.874 |
| Weight (kilogram) | 62.5 ± 11.2 | 61.8 ± 12.1 | 62.7 ± 11.1 | 0.635 |
| Body mass index | 23.8 ±3.5 | 23.4 ± 2.6 | 23.9 ± 3.5 | 0.408 |
| Cough | 199 (65.9) | 24 (60.0) | 175 (66.8) | 0.399 |
| Sputum | 143 (47.4) | 16 (40.0) | 127 (48.5) | 0.317 |
| Chest tightness | 40 (13.2) | 2 (5.0) | 38 (14.5) | 0.099 |
| Wheezing | 30 (9.9) | 9 (22.5) | 21 (8.0) | 0.004 |
| Dyspnea | 91 (30.1) | 19 (47.5) | 72 (27.5) | 0.010 |
| Smoking |  |  |  | 0.987 |
| Never smoker | 184 (70.3) | 23 (71.9) | 161 (69.9) |  |
| Ex-smoker | 34 (13.0) | 4 (12.5) | 30 (13.0) |  |
| Current smoker | 44 (16.8) | 5 (15.6) | 39 (17.0) |  |
| Allergic sensitization | 50 (20.2) | 20 (54.1) | 30 (14.2) | <0.001 |
| Asthma | 44 (15.1) | 26 (70.3) | 18 (7.1) | <0.001 |
| COPD | 1 (0.3) | 1 (2.5) | 0 (0) | 0.133 |
| Spirometric values |  |  |  |  |
| FEV1, L | 2.87 ±0.82 | 2.94 ± 0.89 | 2.86 ± 0.81 | 0.566 |
| FEV1, % of predicted value | 96.1 ± 11.2 | 94.2 ± 12.7 | 96.4 ± 10.9 | 0.243 |
| FVC, L | 3.55 ± 0.98 | 3.76 ± 1.06 | 3.52 ± 0.96 | 0.145 |
| FVC, % of predicted value | 95.0 ± 12.7 | 99.4 ± 16.5 | 94.3 ± 11.9 | 0.067 |
| FEV1/FVC | 80.8 ± 6.07 | 78.1 ± 5.49 | 81.2 ± 6.06 | 0.002 |
| FEF25-75, L/sec | 2.87 ± 1.08 | 2.64 ± 1.09 | 2.90 ± 1.08 | 0.147 |
| FEF25-75, % of predicted value | 95.9 ± 25.9 | 81.7 ± 20.0 | 98.1 ± 26.0 | <0.001 |

NOTE. Data are presented as n (%) or mean ± SD

*P value was calculated by comparison of the AHR group and the non-AHR group.

*Abbreviations*: AHR, airway hyperresponsiveness; COPD, chronic obstructive pulmonary disease; FEV1, forced expiratory volume in 1 second; FVC, forced vital capacity; FEF25-75, forced expiratory flow between 25 and 75% of vital capacity

Supplementary Figure 1. ROC curve of FEF25-75 %pred for predicting AHR (total study population)

ROC, receiver operating characteristic; FEF25-75, forced expiratory flow between 25% and 75% of vital capacity; AHR, airway hyperresponsiveness

Supplementary Figure 2. ROC curve of FEF25-75 %pred for predicting AHR (subjects with normal spirometry)

ROC, receiver operating characteristic; FEF25-75, forced expiratory flow between 25% and 75% of vital capacity; AHR, airway hyperresponsiveness
